# Supplementary material
Source: PubMed Central journal article supplement (PMC7358033)
Supplement: Liaw_Supp_Tables.pdf [file Liaw_Supp_Tables.pdf]

**Supplemental Table 1: Number of Physicians Identified, by Specialty, Year, and Dataset**

| Specialty            | 2014           |       |                |       | 2015           |       |                |       | 2016           |       |                |       |
|----------------------|----------------|-------|----------------|-------|----------------|-------|----------------|-------|----------------|-------|----------------|-------|
|                      | Procedures     | %     | Prescriptions  | %     | Procedures     | %     | Prescriptions  | %     | Procedures     | %     | Prescriptions  | %     |
| Allergy / Immunology | 2,850          | 0.5%  | 3,493          | 0.7%  | 2,895          | 0.5%  | 3,594          | 0.7%  | 2,922          | 0.5%  | 3,647          | 0.7%  |
| Anesthesiology       | 35,088         | 6.7%  | 7,707          | 1.5%  | 35,640         | 6.7%  | 7,744          | 1.4%  | 36,299         | 6.7%  | 7,827          | 1.5%  |
| Cardiology           | 22,510         | 4.3%  | 23,602         | 4.5%  | 22,786         | 4.3%  | 23,831         | 4.5%  | 21,451         | 4.0%  | 24,252         | 4.5%  |
| Dermatology          | 9,776          | 1.9%  | 11,516         | 2.2%  | 9,960          | 1.9%  | 11,763         | 2.2%  | 10,150         | 1.9%  | 12,004         | 2.2%  |
| Emergency Medicine   | 38,304         | 7.3%  | 35,746         | 6.8%  | 39,273         | 7.4%  | 36,561         | 6.8%  | 40,285         | 7.5%  | 36,281         | 6.7%  |
| Endocrinology        | 4,809          | 0.9%  | 5,272          | 1.0%  | 4,963          | 0.9%  | 5,390          | 1.0%  | 5,123          | 1.0%  | 5,585          | 1.0%  |
| Gastroenterology     | 11,534         | 2.2%  | 12,463         | 2.4%  | 11,747         | 2.2%  | 12,615         | 2.4%  | 12,010         | 2.2%  | 12,849         | 2.4%  |
| Hematology-Oncology  | 11,307         | 2.2%  | 11,541         | 2.2%  | 11,623         | 2.2%  | 11,828         | 2.2%  | 11,896         | 2.2%  | 12,026         | 2.2%  |
| Infectious Disease   | 4,863          | 0.9%  | 4,405          | 0.8%  | 4,998          | 0.9%  | 4,559          | 0.9%  | 5,155          | 1.0%  | 4,682          | 0.9%  |
| Nephrology           | 7,282          | 1.4%  | 7,803          | 1.5%  | 7,496          | 1.4%  | 7,997          | 1.5%  | 7,715          | 1.4%  | 8,172          | 1.5%  |
| Neurology            | 12,081         | 2.3%  | 12,599         | 2.4%  | 12,427         | 2.3%  | 12,836         | 2.4%  | 12,852         | 2.4%  | 13,074         | 2.4%  |
| Neurosurgery         | 3,939          | 0.8%  | 3,530          | 0.7%  | 4,027          | 0.8%  | 3,471          | 0.6%  | 4,084          | 0.8%  | 3,428          | 0.6%  |
| OB/GYN               | 20,816         | 4.0%  | 24,736         | 4.7%  | 20,540         | 3.9%  | 24,492         | 4.6%  | 20,416         | 3.8%  | 24,090         | 4.5%  |
| Ophthalmology        | 15,997         | 3.0%  | 18,122         | 3.4%  | 16,072         | 3.0%  | 18,240         | 3.4%  | 16,199         | 3.0%  | 18,345         | 3.4%  |
| Orthopedic Surgery   | 20,810         | 4.0%  | 22,349         | 4.2%  | 21,222         | 4.0%  | 22,423         | 4.2%  | 21,524         | 4.0%  | 22,554         | 4.2%  |
| Otolaryngology       | 7,561          | 1.4%  | 8,982          | 1.7%  | 7,624          | 1.4%  | 9,056          | 1.7%  | 7,648          | 1.4%  | 9,090          | 1.7%  |
| PM&R                 | 6,710          | 1.3%  | 6,779          | 1.3%  | 6,856          | 1.3%  | 6,963          | 1.3%  | 6,969          | 1.3%  | 7,039          | 1.3%  |
| Pathology            | 10,680         | 2.0%  | 455            | 0.1%  | 10,710         | 2.0%  | 412            | 0.1%  | 10,787         | 2.0%  | 375            | 0.1%  |
| Plastic Surgery      | 3,277          | 0.6%  | 3,675          | 0.7%  | 3,292          | 0.6%  | 3,663          | 0.7%  | 3,305          | 0.6%  | 3,607          | 0.7%  |
| Primary Care         | 177,498        | 33.8% | 215,512        | 40.8% | 179,805        | 33.8% | 218,705        | 40.9% | 181,762        | 33.7% | 220,773        | 41.0% |
| Psychiatry           | 20,017         | 3.8%  | 34,440         | 6.5%  | 20,026         | 3.8%  | 34,683         | 6.5%  | 20,016         | 3.7%  | 34,681         | 6.4%  |
| Pulmonology          | 11,150         | 2.1%  | 9,408          | 1.8%  | 11,604         | 2.2%  | 9,568          | 1.8%  | 12,033         | 2.2%  | 9,708          | 1.8%  |
| Radiation Oncology   | 3,822          | 0.7%  | 2,951          | 0.6%  | 3,912          | 0.7%  | 2,973          | 0.6%  | 3,967          | 0.7%  | 3,097          | 0.6%  |
| Radiology            | 25,410         | 4.8%  | 2,281          | 0.4%  | 25,757         | 4.8%  | 2,272          | 0.4%  | 26,246         | 4.9%  | 2,215          | 0.4%  |
| Rheumatology         | 3,936          | 0.7%  | 4,362          | 0.8%  | 4,076          | 0.8%  | 4,482          | 0.8%  | 4,161          | 0.8%  | 4,595          | 0.9%  |
| Surgery              | 25,040         | 4.8%  | 25,119         | 4.8%  | 25,400         | 4.8%  | 25,245         | 4.7%  | 25,756         | 4.8%  | 25,033         | 4.6%  |
| Urology              | 7,899          | 1.5%  | 9,867          | 1.9%  | 7,952          | 1.5%  | 9,935          | 1.9%  | 7,973          | 1.5%  | 9,897          | 1.8%  |
| <b>Total</b>         | <b>524,966</b> |       | <b>528,715</b> |       | <b>532,683</b> |       | <b>535,301</b> |       | <b>538,704</b> |       | <b>538,926</b> |       |

Supplemental materials for: Wingrove P, Liaw W, Weiss J, Petterson S, Maier J, Bazemore A. Using machine learning to predict primary care and advance workforce research. *Ann Fam Med.* 2020;18(4):334-340.

Notes: Procedure data are from the 2014-2016 Centers for Medicare & Medicaid Services (CMS) Provider Utilization & Payment Data Public Use File. Prescribing data are from the 2014-2016 CMS Part D Prescriber Public Use File.

OB/GYN = Obstetrics and Gynecology

PM&R = Physical Medicine & Rehabilitation

**Supplemental Table 2: Mean Combined Model Recall, Precision, and Negative Predictive Value with 95% Confidence Intervals by Specialty**

| Specialty            | Recall (Sensitivity) | Precision (PPV)   | NPV               |
|----------------------|----------------------|-------------------|-------------------|
| Allergy / Immunology | .902[.895 - .909]    | .922[.914 - .929] | .999[.999 - .999] |
| Anesthesiology       | .95[.949 - .952]     | .951[.949 - .953] | .997[.997 - .997] |
| Cardiology           | .922[.918 - .925]    | .954[.952 - .956] | .997[.997 - .997] |
| Dermatology          | .972[.97 - .973]     | .96[.957 - .963]  | .999[.999 - .999] |
| Emergency Medicine   | .878[.875 - .881]    | .916[.914 - .918] | .991[.991 - .992] |
| Endocrinology        | .836[.822 - .849]    | .896[.891 - .901] | .999[.998 - .999] |
| Gastroenterology     | .931[.927 - .936]    | .915[.912 - .919] | .999[.998 - .999] |
| Hematology-Oncology  | .866[.861 - .871]    | .883[.879 - .886] | .997[.997 - .997] |
| Infectious Disease   | .645[.638 - .652]    | .882[.877 - .887] | .997[.997 - .997] |
| Nephrology           | .886[.883 - .889]    | .883[.881 - .885] | .998[.998 - .999] |
| Neurology            | .852[.848 - .856]    | .921[.916 - .926] | .997[.997 - .997] |
| Neurosurgery         | .543[.533 - .552]    | .812[.801 - .824] | .997[.997 - .997] |
| OB/GYN               | .917[.915 - .918]    | .923[.917 - .929] | .996[.996 - .997] |
| Ophthalmology        | .982[.982 - .983]    | .982[.981 - .983] | .999[.999 - .999] |
| Orthopedic Surgery   | .881[.876 - .886]    | .888[.882 - .893] | .995[.995 - .995] |
| Otolaryngology       | .906[.901 - .91]     | .96[.955 - .964]  | .999[.998 - .999] |
| PM&R                 | .477[.474 - .479]    | .761[.756 - .766] | .994[.994 - .994] |
| Pathology            | .982[.981 - .984]    | .991[.99 - .991]  | 1[1 - 1]          |
| Plastic Surgery      | .477[.471 - .483]    | .604[.592 - .616] | .997[.997 - .997] |
| Primary Care         | .936[.935 - .938]    | .903[.901 - .905] | .964[.963 - .965] |
| Psychiatry           | .929[.928 - .929]    | .932[.93 - .935]  | .996[.996 - .996] |
| Pulmonology          | .846[.843 - .849]    | .826[.824 - .828] | .997[.997 - .997] |
| Radiation Oncology   | .934[.928 - .939]    | .945[.934 - .956] | 1[1 - 1]          |
| Radiology            | .968[.967 - .968]    | .99[.989 - .991]  | .999[.999 - .999] |
| Rheumatology         | .928[.923 - .934]    | .903[.899 - .908] | .999[.999 - 1]    |
| Surgery              | .822[.813 - .831]    | .731[.716 - .747] | .991[.991 - .992] |
| Urology              | .953[.948 - .958]    | .97[.964 - .976]  | .999[.999 - .999] |

Supplemental materials for: Wingrove P, Liaw W, Weiss J, Petterson S, Maier J, Bazemore A. Using machine learning to predict primary care and advance workforce research. *Ann Fam Med.* 2020;18(4):334-340.

OB/GYN = Obstetrics and Gynecology

PM&R = Physical Medicine & Rehabilitation

PPV = Positive Predictive Value

NPV = Negative Predictive Value

**Supplemental Table 3. Area under the Receiver Operating Characteristic (ROC) Curve, by Specialty, for the 2016 Combined Random Forest Applied to the 2016 Test Data**

| <b>Specialty</b>     | <b>Area Under the ROC Curve</b> |
|----------------------|---------------------------------|
| Allergy / Immunology | 0.995                           |
| Anesthesiology       | 0.997                           |
| Cardiology           | 0.997                           |
| Dermatology          | 0.998                           |
| Emergency Medicine   | 0.985                           |
| Endocrinology        | 0.995                           |
| Gastroenterology     | 0.998                           |
| Hematology-Oncology  | 0.991                           |
| Infectious Disease   | 0.992                           |
| Nephrology           | 0.992                           |
| Neurology            | 0.994                           |
| Neurosurgery         | 0.988                           |
| OB/GYN               | 0.995                           |
| Ophthalmology        | 0.999                           |
| Orthopedic Surgery   | 0.995                           |
| Otolaryngology       | 0.994                           |
| PM&R                 | 0.998                           |
| Pathology            | 0.991                           |
| Plastic Surgery      | 0.984                           |
| Primary Care         | 0.982                           |
| Psychiatry           | 0.997                           |
| Pulmonology          | 0.992                           |
| Radiation Oncology   | 0.992                           |
| Radiology            | 0.998                           |
| Rheumatology         | 0.996                           |

Supplemental materials for: Wingrove P, Liaw W, Weiss J, Petterson S, Maier J, Bazemore A. Using machine learning to predict primary care and advance workforce research. *Ann Fam Med.* 2020;18(4):334-340.

|         |       |
|---------|-------|
| Surgery | 0.984 |
| Urology | 0.998 |

---

**Note:**

ROC = Receiver Operating Characteristic

OB/GYN = Obstetrics and Gynecology

PM&R = Physical Medicine & Rehabilitation
